# Supplementary material for: Compared Healing of Mandibular Condylar Fractures with Open and Closed Reduction Surgical Methods (Radiological Analysis, Gray Scale)
Source: Research Square preprint supplement (doi:10.21203/rs.3.rs-7613590/v1), 2025-10-19
Supplement: Supplementary file 1 [file 95676dab7a690ae72c0421b5.pdf]

# Oral Radiology

## AUTHOR SUBMISSION CHECKLIST

Authors should refer to the following checklist to ensure that manuscripts are formatted according to the “Instructions for Authors” before submission to Oral Radiology (<http://www.springer.com/journal/11282/>). The checklist must be submitted by uploading it as a PDF file at the same time you submit your manuscript via Editorial Manager. Manuscripts formatted incorrectly will need to be sent back to authors for changes.

- ☒ Certification Form completed (Signed by all authors)
- ☒ Uniform Disclosure Form (available at: [http://www.icmje.org/coi\\_disclosure.pdf](http://www.icmje.org/coi_disclosure.pdf)) completed
- ☒ Conforms to Ethical Standards
- ☒ Conflict of interest statement is presented on every manuscript in the title page
- ☐ For studies with human subjects, the following statement is included in the title page:  
*'All procedures followed were in accordance with the ethical standards of the responsible committee on human experimentation (institutional and national) and with the Helsinki Declaration of 1975, as revised in 2008 (5). Informed consent was obtained from all patients for being included in the study.'*
- ☒ Identifying information of patients or human subjects is not included in the article. If any identifying information about patients is included, the following sentence is also included:  
*'Additional informed consent was obtained from all patients for which identifying information is included in this article.'*
- ☐ For studies with animals, the following sentence is included in the title page  
*'All institutional and national guidelines for the care and use of laboratory animals were followed.'*
- ☐ If no animal and/or human studies were carried out for this article, the following statement is included in the title page:  
*'This article does not contain any studies with human or animal subjects performed by the any of the authors.'*
- ☒ Use a normal, plain font (e.g., 10-point Times Roman) for text

The title page should include:

- ☒ A concise and informative title
- ☒ The name(s) of the author(s)
- ☒ The affiliation(s) and address(es) of the author(s)
- ☒ The e-mail address, telephone and fax numbers of the corresponding author
- ☒ Key words (three to five)

An abstract should be no more than 250 words

- ☒ For original articles, the abstract should contain the subheadings Objectives, Methods, Results, Conclusions
- ☒ For other types of articles, subheadings in the abstract are optional

References should be:

- ☒ Cited in sequence in the text
- ☒ Cited using numbers in square brackets on the line
- ☒ All necessary tables, including titles, are provided
- ☒ All necessary figures, including legends, are provided
- ☒ All references, figures, and tables cited in text
- ☒ Confirm that figures are clearly legible
